# Supplementary material
Source: PubMed Central journal article supplement (PMC6613543)
Supplement: NIHMS1036583-supplement-1.pdf [file NIHMS1036583-supplement-1.pdf]

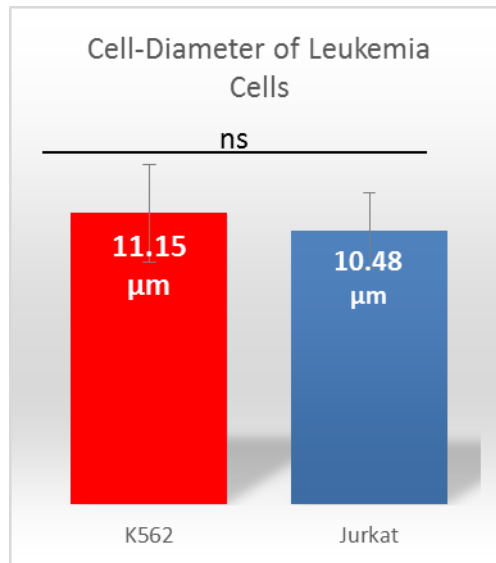

*Supplementary Figure 1. Bar graph of the single-cell diameter of K562 and Jurkat cells with no significant difference, showing the overlap of cell diameter among the different types of leukemia cells.*

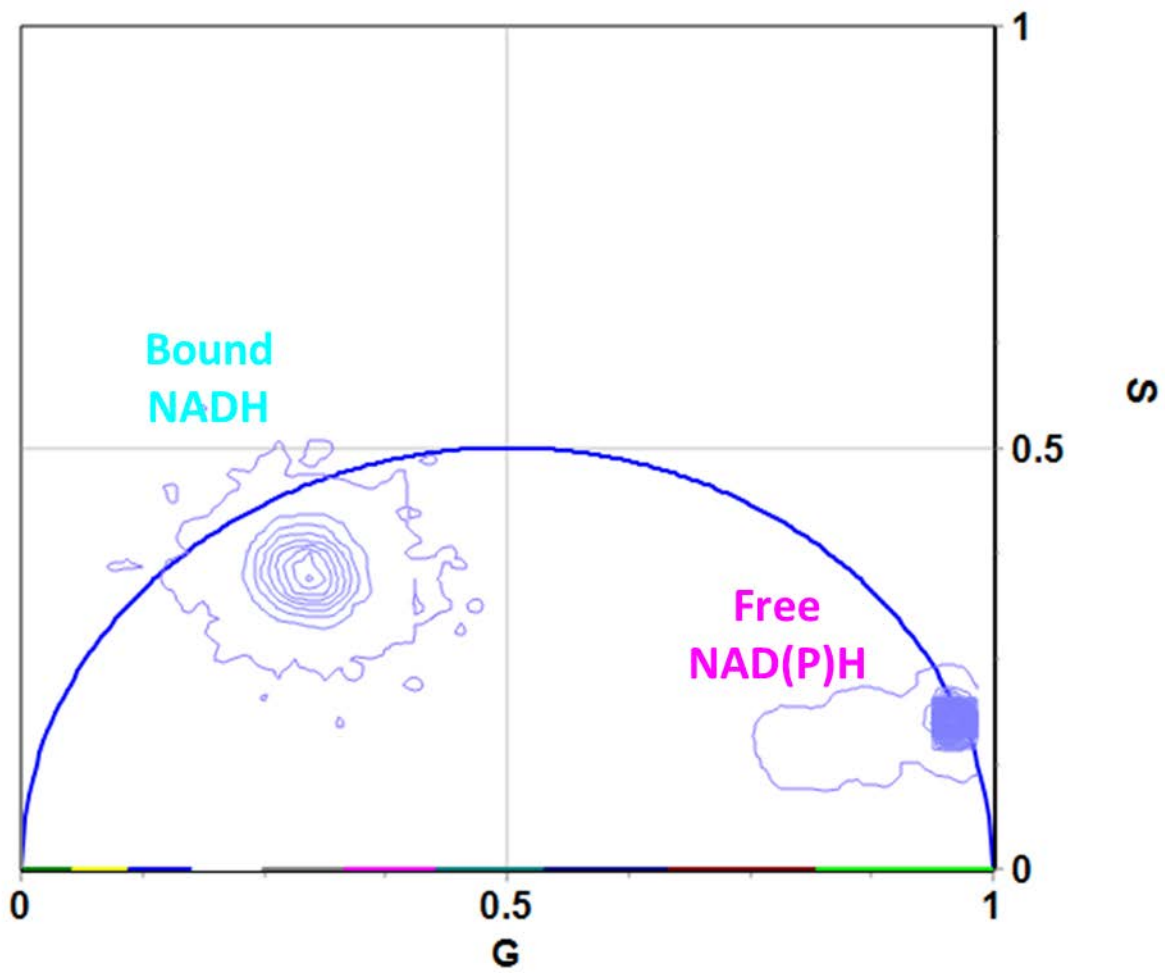

Supplementary Figure 2. Phasors of pure chemical species identify tissue components, free NADH and NADPH as well as bound NADH with lactate dehydrogenase.
